# Supplementary material
Source: publisher site journal article supplement (https://zse.pensoft.net/article/81463/download/suppl/31/)
Supplement: Supplementary file 1

## Sheet: Sayfa1
Species	COI		Cytb
	GenBank Acc. Number	References	GenBank Acc. Number	References
Capoeta umbla	MH592464.1	Bektaş et al., 2019	KY065270.1	Bektaş et al., 2017
C. damascina	MH592451.1	Bektaş et al., 2019	KY065262.1	Bektaş et al., 2017
C. pyragyi	MF621293.1	Zareian and Esmaeili, 2017	MF621322.1	Zareian and Esmaeili, 2017
C. caelestis	MH592447.1	Bektaş et al., 2019	KY065261.1	Bektaş et al., 2017
C. ferdowsii	MF621297.1	Zareian and Esmaeili, 2017	KM459663.1	Ghanavi et al., 2016
C. buhsei	KM590411.1	Hashemzadeh Segherloo et al., Unpublished	JF798283.1	Levin et al., 2012
C. coadi	KU564295.1	Alwan et al., 2016	KU564306.1	Alwan et al., 2016
C. birunii	MF621292.1	Zareian and Esmaeili, 2017	MF621323.1	Zareian and Esmaeili, 2017
C. shajariani	MF621301.1	Zareian and Esmaeili, 2017	KU167947.1	Ghanavi et al., 2016
C. banarescui	MH592441.1	Bektaş et al., 2019	GQ423977.1	Bektaş et al., 2017
C. pestai	MH592457.1	Bektaş et al., 2019	KY065272.1	Bektaş et al., 2017
C. antalyensis	MH592434.1	Bektaş et al., 2019	GQ424021.1	Bektaş et al., 2017
C. tinca	MH592461.1	Bektaş et al., 2019	GQ424006.1	Bektaş et al., 2017
C. baliki	MH592439.1	Bektaş et al., 2019	GQ424011.1	Bektaş et al., 2017
C. bergamae	MH592445.1	Bektaş et al., 2019	KY065273.1	Bektaş et al., 2017
C. aydinensis	MH592437.1	Bektaş et al., 2019	KY065274.1	Bektaş et al., 2017
C. sieboldii	MH592459.1	Bektaş et al., 2019	KY065259.1	Bektaş et al., 2017
C. capoeta	MH592449.1	Bektaş et al., 2019	KY065278.1	Bektaş et al., 2017
C. ekmekciae	MH592454.1	Bektaş et al., 2019	GQ424025.1	Bektaş et al., 2017
C. sevangi	MF664686.1	Zareian et al., 2018	JF798302.1	Levin et al., 2012
C. heratensis	MF664712.1	Zareian et al., 2018	KU167893.1	Ghanavi et al., 2016
C. razii	MF664707.1	Zareian et al., 2018	MF664725.1	Zareian et al., 2018
C. fusca	MF664700.1	Zareian et al., 2018	KU312371.1	Zareian et al., 2016
C. gracilis	MF664699.1	Zareian et al., 2018	MF664729.1	Zareian et al., 2018
C. aculeata	KM590406.1	Hashemzadeh Segherloo et al., Unpublished	JF798265.1	Levin et al., 2012
C. macrolepis	MF664720.1	Zareian et al., 2018	MF664744.1	Zareian et al., 2018
Paracapoeta barroisi	MH592443.1	Bektaş et al., 2019	KY065284.1	Bektaş et al., 2017
P. erhani	MH592455.1	Bektaş et al., 2019	KY065282.1	Bektaş et al., 2017
P. mandica	KU312366.1	Zareian et al., 2016	KM459649.1	Ghanavi et al., 2016
P. trutta	MH592463.1	Bektaş et al., 2019	KY065286.1	Bektaş et al., 2017
P. anamisensis	KU312340.1	Zareian et al., 2016	KU312381.1	Zareian et al., 2016
Luciobarbus comizo	KJ553752.1	Geiger et al., 2014	AF334042.1	Doadrio et al., 2002
L. steindachneri	KJ553791.1	Geiger et al., 2014	AF045968.1	Zardoya and Doadrio, 1998
L. bocagei	KJ553712.1	Geiger et al., 2014	MN961178.1	Benovics et al., 2020
L. sclateri	KJ553687.1	Geiger et al., 2014	AJ698690.1	Mesquita et al., 2007
L. setivimensis	KJ554057.1	Geiger et al., 2014	MH042722.1	Touil et al., 2019
L. graellsii	KJ553938.1	Geiger et al., 2014	JN049525.1	Buonerba et al., 2013
L. guiraonis	KJ553717.1	Geiger et al., 2014	MN961182.1	Benovics et al., 2020
L. microcephalus	KJ554062.1	Geiger et al., 2014	AJ698688.1	Mesquita et al., 2007
L. albanicus	KJ554077.1	Geiger et al., 2014	AF112126.1	Tsigenopoulos and Berrebi, 2000
L. mursa	MF106171.1	Khaefi et al., 2017	JF798263.1	Levin et al., 2012
L. graecus	KJ554075.1	Geiger et al., 2014	AF145941.1	Tsigenopoulos et al., 2003
L. esocinus	KM590441.1	Hashemzadeh Segherloo et al., Unpublished	KP712264.1	Yang et al., 2015
L. xanthopterus	MF599076.1	Khaefi et al., 2018	AF145939.1	Tsigenopoulos et al., 2003
L. longiceps	KJ553925.1	Geiger et al., 2014	AF145942.1	Tsigenopoulos et al., 2003
L. pectoralis	KJ553955.1	Geiger et al., 2014	AF145933.1	Tsigenopoulos et al., 2003
L. brachycephalus	KP712068.1	Yang et al., 2015	KP712167.1	Yang et al., 2015
L. capito	KM590440.1	Hashemzadeh Segherloo et al., Unpublished	KP712171.1	Yang et al., 2015
L. callensis	KJ553762.1	Geiger et al., 2014	KY828022.1	Brahimi et al., 2017
L. leptopogon	KJ554037.1	Geiger et al., 2014	KY828003.1	Brahimi et al., 2017
L. figuigensis	KJ554042.1	Geiger et al., 2014	KU577514.1	Brahimi et al., 2016
L. pallaryi	KJ553895.1	Geiger et al., 2014	MH042690.1	Touil et al., 2019
L. biscarensis	KJ554045.1	Geiger et al., 2014	MH042693.1	Touil et al., 2019
L. moulouyensis	KJ553952.1	Geiger et al., 2014	AF145925.1	Tsigenopoulos et al., 2003
L. issiensis	KJ553968.1	Geiger et al., 2014	AF145928.1	Tsigenopoulos et al., 2003
L. massaensis	KJ553867.1	Geiger et al., 2014	MN961187.1	Benovics et al., 2020
L. ksibi	KJ552356.1	Geiger et al., 2014	MN961184.1	Benovics et al., 2020
L. magniatlantis	KJ553776.1	Geiger et al., 2014	KU257530.1	Doadrio et al., 2016
L. nasus	KJ553700.1	Geiger et al., 2014	KU257539.1	Doadrio et al., 2016
L. subquincunciatus	none	none	AF145937.1	Durand et al., 2002
Barbus cyclolepis	MK716237.1	Güçlü et al., 2020	HQ167606.1	Keskin, Unpublished
B. petenyi	MF106155.1	Khaefi et al., 2017	AF090788.1	Zardoya and Doadrio, 1999
B. cyri	MF106165.1	Khaefi et al., 2017	MK108287.1	Levin et al., 2019
B. kubanicus	MH407600.1	Turan et al., 2018	MK108273.1	Levin et al., 2019
B. barbus	MH407647.1	Turan et al., 2018	KC465926.1	Meraner et al., 2013
B. tauricus	MK716238.1	Güçlü et al., 2020	MH010350.1	Özpiçak and Polat, 2019
Aulopyge huegelii	KJ552727.1	Geiger et al., 2014	MT921954.1	Ludoski et al., 2020
Cyprinion semiplotum	KJ957768.1	Rahman et al., Unpublished.	KP712179.1	Yang et al., 2015
C. macrostomum	MW250387.1	Agha et al, Unpublished.	AF180826.1	Durand et al., 2002
Scaphiodonichthys acanthopterus	NC018789.1	Yang et al., 2013	KP712151.1	Yang et al., 2015
S. burmanicus	NC031605.1	Miya, Unpublished.	KP712188.1	Yang et al., 2015
References
Agha,G.F., Abdullah,S.M. and Ahmad,M.A. (Unpublished/GenBank). DNA barcoding of the Cyprindae from Greater Zab River_Gwer in Kurdistan Region
Alwan, N.H., Zareian, H., Esmaeili, H.R. (2016). Capoeta coadi, a new species of cyprinid fish from the Karun River drainage, Iran based on morphological and molecular evidences (Teleostei, Cyprinidae). Zookeys.16;(572):155-180. doi: 10.3897/zookeys.572.7377.
Bektas, Y., Aksu, I., Kaya, C. and Turan, D. (2019). DNA barcoding of the Genus Capoeta (Actinopterygii: Cyprinidae) from Anatolia. Turkish Journal of Fisheries and Aquatic Sciences, 19, 739-752. http://doi.org/10.4194/1303-2712-v19_9_03
Bektas, Y., Turan, D., Aksu, I., Ciftci, Y., Eroglu, O., Kalayci, G. and Belduz, A.O. (2017). Molecular phylogeny of the genus Capoeta (Teleostei: Cyprinidae) in Anatolia, Turkey Biochem. Syst. Ecol., 70, 80-94, 10.1016/j.bse.2016.11.005
Benovics M, Vukić J, Šanda R, Rahmouni I and Šimková A. (2020). Disentangling the evolutionary history of peri-Mediterranean cyprinids using host-specific gill monogeneans. Int J Parasitol. 50(12):969-984. doi: 10.1016/j.ijpara.2020.05.007.
Brahimi A, Tarai N, Benhassane A, Henrard A, and Libois R. (2016). Genetic and morphological consequences of Quaternary glaciations: A relic barbel lineage (Luciobarbus pallaryi, Cyprinidae) of Guir Basin (Algeria). C R Biol. 2016 Feb;339(2):83-98. doi: 10.1016/j.crvi.2015.12.003.
Brahimi A. Freyhof J. Henrard A. And Libois R. (2017). Luciobarbus chelifensis and L. mascarensis, two new species from Algeria (Teleostei: Cyprinidae). Zootaxa 4277 (1): 32-50. DOI :10.11646/zootaxa.4277.1.3.
Buonerba, L., Pompei, L. and Lorenzoni, M. (2013). First record of Iberian barbel Luciobarbus graellsii (Steindachner, 1866) in the Tiber River (Central Italy). BioInvasions Records, 2, 297-301.
Doadrio I, Carmona JA and Machordom A. (2002). Haplotype diversity and phylogenetic relationships among the Iberian barbels (Barbus, Cyprinidae) reveal two evolutionary lineages. J Hered. 93(2):140-7. doi: 10.1093/jhered/93.2.140.
Doadrio, I., Casal-López, M., Perea, S., and Yahyaoui, A. (2016). Taxonomy of rheophilic Luciobarbus Heckel, 1842 (Actinopterygii, Cyprinidae) from Morocco with the description of two new species. Graellsia, 72(1), .
Durand JD, Tsigenopoulos CS, Unlü E and Berrebi P. (2002). Phylogeny and biogeography of the family Cyprinidae in the Middle East inferred from cytochrome b DNA- evolutionary significance of this region. Mol Phylogenet Evol. 22(1):91-100. doi: 10.1006/mpev.2001.1040.
Geiger MF, Herder F, Monaghan MT, Almada V, Barbieri R, Bariche M, Berrebi P, Bohlen J, Casal-Lopez M, Delmastro GB, Denys GP, Dettai A, Doadrio I, Kalogianni E, Kärst H, Kottelat M, Kovačić M, Laporte M, Lorenzoni M, Marčić Z, Özuluğ M, Perdices A, Perea S, Persat H, Porcelotti S, Puzzi C, Robalo J, Šanda R, Schneider M, Šlechtová V, Stoumboudi M, Walter S, Freyhof J. (2014). Spatial heterogenei…
Ghanavi, H. R., Gonzalez, E. G. and Doadrio, I. (2016), Phylogenetic relationships of freshwater fishes of the genus Capoeta (Actinopterygii, Cyprinidae) in Iran. Ecology and Evolution, 6: 8205– 8222. doi: 10.1002/ece3.2411
Güçlü, S.S., Kalaycı, G., Küçük, F., Turan, D. (2020). Barbus xanthos, a new barbel from the Southern Aegean basin (Teleostei: Cyprinidae). J Fish Biol. 96(6):1309-1319. doi: 10.1111/jfb.14259.
Hashemzadeh Segherloo, I., Abdoli, A., Bernatchez, L., Khajeh, P., Puria, M., Mobasherizadeh, Z., Tabatabaei, S.N., Eagderi, S., Hallerman, E., Badri Fariman, M., Golzarianpour, K. and Pourahmad, R. (Unpublished/GenBank). Phylogenetic relationships of the Iranian Barbels and possible scenarios for Barbin fish spread.
Keskin,E. (Unpublished/GenBank). Phylogenetic Relationship Among Some Endemic and Endangered Cypriniformes species in Turkey.
Khaefi, R., Esmaeili, H.R. and Chermahini, M.A. (2018). Natural hybridization of Luciobarbus barbulus x Luciobarbus kersin and Luciobarbus barbulus x Luciobarbus xanthopterus in the Persian Gulf Basin. Turkish Journal of Fisheries and Aquatic Sciences, 18, 1399-1407. http://doi.org/10.4194/1303-2712-v18_12_08
Khaefi, R., Esmaeili, H.R., Geiger, M.F. and Eagderi, S. (2017). Taxonomic review of the cryptic Barbus lacerta species group with description of a new species (Teleostei: Cyprinidae). 2(2): 90-115.
Levin BA, Gandlin AA, Simonov ES, Levina MA, Barmintseva AE, Japoshvili B, Mugue NS, Mumladze L, Mustafayev NJ, Pashkov AN, Roubenyan HR, Shapovalov MI, and Doadrio I. (2019). Phylogeny, phylogeography and hybridization of Caucasian barbels of the genus Barbus (Actinopterygii, Cyprinidae). Mol Phylogenet Evol. 135:31-44. doi: 10.1016/j.ympev.2019.02.025.
Levin, B.A., Freyhof, J., Lajbner, Z., Perea, S., Abdoli, A., Gaffaroğlu, M., Ozuluğ, M., Rubenyan, H.R., Salnikov, V.B. and Doadrio, I. (2012). Phylogenetic relationships of the algae scraping cyprinid genus Capoeta (Teleostei: Cyprinidae). Mol Phylogenet Evol. 62(1):542-9. doi: 10.1016/j.ympev.2011.09.004.
Ludoški J, Francuski L, Lukač M, Dekić R and Milankov V. (2020). Toward the conservation of the endemic monotypic fish genus Aulopyge from the Balkan Dinaric karst: Integrative assessment of introduced and natural population. Ecol Evol. 11(2):688-699. doi: 10.1002/ece3.7108.
Meraner A, Venturi A, Ficetola GF, Rossi S, Candiotto A and Gandolfi A. (2013). Massive invasion of exotic Barbus barbus and introgressive hybridization with endemic Barbus plebejus in Northern Italy: where, how and why? Mol Ecol. 22(21):5295-312. doi: 10.1111/mec.12470.
Mesquita, N., Cunha, C., Carvalho, G.R. and Coelho, M.M. (2007). Comparative phylogeography of endemic cyprinids in the south-west Iberian Peninsula: evidence for a new ichthyogeographic area. Journal of Fish Biology, 71: 45-75. https://doi.org/10.1111/j.1095-8649.2007.01518.x
Miya, M. (Unpublished/GenBank). Whole mitochondrial genome sequences in Cypriniformes.
Özpiçak, M. and Polat, N. (2019). Determination of genetic structure in Barbus tauricus Kessler, 1877 populations inhabiting a few streams along the Black Sea Region (Turkey) inferred from mtDNA Cytochrome b gene sequence analysis . Ege Journal of Fisheries and Aquatic Sciences , 36 (1) , 1-11 . DOI: 10.12714/egejfas.2019.36.1.01
Rahman, S., Barua, E., Das, D.N., Dutta, A. and Kalita, M.C. (Unpublished/GenBank). DNA barcoding in threatened Assamese Kingfish, Cyprinion semiplotum(McClelland, 1839).
Touil A, Casal-Lopez M, Bouhadad R and Doadrio I. (2019). Phylogeny and phylogeography of the genus Luciobarbus (Haeckel, 1843) in Algeria inferred from mitochondrial DNA sequence variation. Mitochondrial DNA A DNA Mapp Seq Anal. 2019 Mar;30(2):332-344. doi: 10.1080/24701394.2018.1526928.
Tsigenopoulos CS and Berrebi P. (2000). Molecular phylogeny of north mediterranean freshwater barbs (genus Barbus: cyprinidae) inferred from cytochrome b sequences: biogeographic and systematic implications. Mol Phylogenet Evol. 14(2):165-79. doi: 10.1006/mpev.1999.0702.
Tsigenopoulos, C.S., Durand, J.D., Ünlü, E. and Berrebi, P. (2003), Rapid radiation of the Mediterranean Luciobarbus species (Cyprinidae) after the Messinian salinity crisis of the Mediterranean Sea, inferred from mitochondrial phylogenetic analysis. Biological Journal of the Linnean Society, 80: 207-222. https://doi.org/10.1046/j.1095-8312.2003.00237.x
Turan, D., Kaya, C., Geiger, M. and Freyhof, J. (2018). Barbus anatolicus, a new barbel from the Kızılırmak and Yeşilırmak River drainages in northern Anatolia (Teleostei: Cyprinidae). Zootaxa. 4461(4):539-557. doi: 10.11646/zootaxa.4461.4.5.
Yang, J.Q., Cheng, H.L., Wu, C.Y., Tsai, K.C., Chiang, H.C., Weng, C.W. and Lin HD. (2013). Complete mitochondrial genome of Scaphiodonichthys acanthopterus (Cypriniformes, Cyprinidae). Mitochondrial DNA. 24(2):108-10. doi: 10.3109/19401736.2012.726622.
Yang, L., Sado, T., Vincent Hirt, M., Pasco-Viel, E., Arunachalam, M., Li, J., Wang, X., Freyhof, J., Saitoh, K., Simons, A.M., Miya, M., He, S. and Mayden, R.L. (2015). Phylogeny and polyploidy: resolving the classification of cyprinine fishes (Teleostei: Cypriniformes). Mol Phylogenet Evol. 85:97-116. doi: 10.1016/j.ympev.2015.01.014.
Zardoya R and Doadrio I. (1998). Phylogenetic relationships of Iberian cyprinids: systematic and biogeographical implications. Proc Biol Sci. 265(1403):1365-72. doi: 10.1098/rspb.1998.0443.
Zardoya R and Doadrio I. (1999). Molecular evidence on the evolutionary and biogeographical patterns of European cyprinids. J Mol Evol. 49(2):227-37. doi: 10.1007/pl00006545. PMID: 10441674.
Zareian H. and Esmaeili, H.R. (2017). Mitochondrial phylogeny and taxonomic status of the Capoeta damascina species group (Actinopterygii: Cyprinidae) in Iran with description of a new species. Iranian Journal of Ichthyology 4 (3): 231-269.
Zareian, H., Esmaeili, H.R, Freyhof, J. (2016). Capoeta anamisensis, a new species from the Minab and Hasan Langhi River drainages in Iran (Teleostei: Cyprinidae). Zootaxa; 4083(1):126-42. doi: 10.11646/zootaxa.4083.1.7. PMID: 27394223.
Zareian, H., Esmaeili, H.R., Gholamhosseini, A. et al. (2018). Diversity, mitochondrial phylogeny, and ichthyogeography of the Capoeta capoeta complex (Teleostei: Cyprinidae). Hydrobiologia 806, 363–409. https://doi.org/10.1007/s10750-017-3375-0
